# Supplementary material
Source: PubMed Central journal article supplement (PMC4431621)
Supplement: NIHMS395952-supplement-Supplementary_files.pdf [file NIHMS395952-supplement-Supplementary_files.pdf]

**Table e-1. Baseline Characteristics by Study Site and Group (n=361)**

| <b>Baseline Characteristics</b>    | <b>CHARTER<br/>(n=117)</b> | <b>University of<br/>Hawaii<br/>(n=30)</b> | <b>Johns Hopkins<br/>(n=89)</b> | <b>University of<br/>Puerto Rico<br/>(n=55)</b> | <b>HIV- Control<br/>(n=30)</b> | <b>RRMS<br/>Disease<br/>Control<br/>(n=40)</b> |
|------------------------------------|----------------------------|--------------------------------------------|---------------------------------|-------------------------------------------------|--------------------------------|------------------------------------------------|
| Age, mean (SD)                     | 42.2 (7.6)                 | 47.0 (9.2)                                 | 47.0 (5.7)                      | 37.4 (6.8)                                      | 51.2 (13.2)                    | 42.6 (10.0)                                    |
| Education, mean (SD)               | 12.7 (2.6)                 | 14.3 (2.4)                                 | 12.4 (1.9)                      | 12.2 (2.1)                                      | 15.6 (2.5)                     | nd                                             |
| Male, n(%)                         | 84/117 (74.4%)             | 28/30 (93.3%)                              | 60/89 (67.4%)                   | 0/55                                            | 27/30 (90.0%)                  | 9/40 (22.5%)                                   |
| Nadir CD4, mean (SD)               | 203.0 (195.1)              | 151.0 (140.3)                              | 123.3 (128.2)                   | 237.5 (189.6)                                   |                                |                                                |
| CD4, mean (SD)                     | 465.5 (277.7)              | 435.9 (241.0)                              | 394.9 (220.8)                   | 388.0 (248.7)                                   |                                |                                                |
| Detectable plasma viral load, n(%) | 65/116 (56.0%)             | 24/30 (80.0%)                              | 28/85 (32.9%)                   | 41/53 (77.4%)                                   |                                |                                                |
| Detectable CSF viral load, n(%)    | 42/117 (35.9%)             | nd                                         | 18/70 (25.7%)                   | 19/54 (35.2%)                                   |                                |                                                |
| Current ARV medication, n(%)       | 82/117 (70.1%)             | 22/25 (88.0%)                              | 87/89 (97.8%)                   | 46/47 (97.9%)                                   |                                |                                                |
| MSK, n(%)                          |                            |                                            |                                 |                                                 |                                |                                                |
| 0.0                                | 46 (39.3%)                 | 14 (46.7%)                                 | 20 (22.5%)                      | 6 (10.9%)                                       |                                |                                                |
| 0.5                                | 39 (33.3%)                 | 11 (46.7%)                                 | 32 (36.0%)                      | 31 (56.4%)                                      |                                |                                                |
| 1                                  | 26 (22.2%)                 | 5 (16.7%)                                  | 29 (32.6%)                      | 6 (10.9%)                                       |                                |                                                |
| 2                                  | 6 (5.1%)                   | 0                                          | 8 (9.0%)                        | 10 (18.2%)                                      |                                |                                                |

CNS HIV Anti-Retroviral Therapy Effects Research (CHARTER) includes: The Mount Sinai School of Medicine, the University of California in San Diego, the University of Texas Medical Branch, the University of Washington. RRMS = Relapse-Remitting Multiple Sclerosis; nd = no data

**Table e-2. CSF Log Sphingolipids Predict Cognitive Decline in HIV+ Individuals, as Measured by Increased MSK**

| Baseline Log Sphingolipid           | Cognitive Decline – All (n=203) |             | Cognitive Decline – Visits <365 days (n=165) |             |
|-------------------------------------|---------------------------------|-------------|----------------------------------------------|-------------|
|                                     | OR (95% CI)                     | p-value     | OR (95% CI)                                  | p-value     |
| <b>Ceramide</b>                     |                                 |             |                                              |             |
| 16:0                                | 1.24 (0.85, 1.82)               | 0.26        | 1.21 (0.80, 1.81)                            | 0.37        |
| 18:0                                | 1.11 (0.79, 1.55)               | 0.55        | 1.09 (0.76, 1.56)                            | 0.63        |
| 20:0                                | 1.26 (0.88, 1.81)               | 0.21        | 1.22 (0.83, 1.79)                            | 0.32        |
| 24:1                                | 1.31 (0.91, 1.88)               | 0.14        | 1.28 (0.88, 1.87)                            | 0.19        |
| 24:0                                | 1.20 (0.88, 1.64)               | 0.25        | 1.17 (0.84, 1.63)                            | 0.34        |
| <b>Sphingomyelin</b>                |                                 |             |                                              |             |
| 16:0                                | 0.91 (0.67, 1.23)               | 0.54        | 0.87 (0.63, 1.19)                            | 0.37        |
| 18:1                                | 0.91 (0.68, 1.22)               | 0.53        | 0.87 (0.65, 1.18)                            | 0.37        |
| 18:0                                | 0.90 (0.67, 1.19)               | 0.44        | 0.86 (0.64, 1.15)                            | 0.32        |
| 20:1                                | 0.95 (0.69, 1.29)               | 0.73        | 0.89 (0.65, 1.23)                            | 0.49        |
| 22:1                                | 0.95 (0.70, 1.28)               | 0.72        | 0.89 (0.65, 1.21)                            | 0.45        |
| 22:0                                | 0.92 (0.67, 1.25)               | 0.59        | 0.87 (0.63, 1.20)                            | 0.38        |
| 24:1                                | 0.94 (0.70, 1.26)               | 0.68        | 0.89 (0.66, 1.21)                            | 0.46        |
| 24:0                                | 0.98 (0.77, 1.24)               | 0.85        | 0.94 (0.73, 1.20)                            | 0.62        |
| <b>Sphingomyelin/Ceramide Ratio</b> |                                 |             |                                              |             |
| 16:0                                | 0.13 (0.01, 1.83)               | 0.13        | 0.13 (0.01, 2.04)                            | 0.15        |
| 18:0                                | 0.12 (0.01, 2.97)               | 0.20        | 0.11 (0.01, 3.08)                            | 0.20        |
| 24:1                                | <b>0.06 (0.01, 0.96)</b>        | <b>0.05</b> | <b>0.06 (0.01, 0.94)</b>                     | <b>0.05</b> |
| 24:0                                | 0.50 (0.04, 5.71)               | 0.58        | 0.49 (0.05, 5.00)                            | 0.54        |
| <b>Total</b>                        |                                 |             |                                              |             |
| Total Ceramide                      | 1.21 (0.84, 1.74)               | 0.30        | 1.20 (0.82, 1.76)                            | 0.35        |
| Total Sphingomyelin                 | 0.90 (0.67, 1.22)               | 0.50        | 0.86 (0.62, 1.17)                            | 0.33        |
| Total Sphingomyelin/Ceramide Ratio  | 0.07 (0.002, 2.55)              | 0.15        | 0.06 (0.01, 2.38)                            | 0.13        |

All models control for time between visit and site. The first model includes all individuals. The second model only includes those with less than one year between visits.

**Table e-3. CSF Log Cholesterol Esters Predict Cognitive Decline and CSF Triglycerides Predict Cognitive Improvement Among HIV-positive Individuals**

| Baseline Log Cholesterol   | Cognitive Decline        |              |                                |              | Cognitive Improvement    |              |                                |              |
|----------------------------|--------------------------|--------------|--------------------------------|--------------|--------------------------|--------------|--------------------------------|--------------|
|                            | All (n=198)              |              | < 1 year between visit (n=163) |              | All (n=198)              |              | < 1 year between visit (n=163) |              |
|                            | OR (95% CI)              | p-value      | OR (95% CI)                    | p-value      | OR (95% CI)              | p-value      | OR (95% CI)                    | p-value      |
| Cholesterol Ester          |                          |              |                                |              |                          |              |                                |              |
| 20:6                       | 0.66 (0.42, 1.04)        | 0.08         | 0.61 (0.37, 0.99)              | 0.05         | 0.93 (0.65, 1.32)        | 0.68         | 0.98 (0.68, 1.41)              | 0.90         |
| 22:6                       | <b>0.62 (0.38, 0.99)</b> | <b>0.05</b>  | <b>0.57 (0.35, 0.93)</b>       | <b>0.02</b>  | 0.78 (0.53, 1.15)        | 0.21         | 0.79 (0.53, 1.18)              | 0.25         |
| 20:5                       | <b>0.55 (0.35, 0.87)</b> | <b>0.01</b>  | <b>0.46 (0.27, 0.76)</b>       | <b>0.003</b> | 1.03 (0.69, 1.54)        | 0.88         | 1.05 (0.68, 1.63)              | 0.82         |
| 22:5                       | <b>0.66 (0.45, 0.96)</b> | <b>0.03</b>  | <b>0.62 (0.42, 0.92)</b>       | <b>0.002</b> | 0.93 (0.69, 1.25)        | 0.64         | 0.94 (0.70, 1.28)              | 0.71         |
| 18:4                       | 0.78 (0.48, 1.27)        | 0.32         | 0.72 (0.43, 1.19)              | 0.20         | 1.07 (0.74, 1.56)        | 0.71         | 1.13 (0.76, 1.69)              | 0.55         |
| 20:4                       | <b>0.62 (0.40, 0.95)</b> | <b>0.03</b>  | <b>0.49 (0.30, 0.81)</b>       | <b>0.006</b> | 1.16 (0.80, 1.70)        | 0.43         | 1.22 (0.80, 1.88)              | 0.36         |
| 18:3                       | <b>0.63 (0.39, 0.99)</b> | <b>0.05</b>  | <b>0.52 (0.31, 0.87)</b>       | <b>0.01</b>  | 1.08 (0.73, 1.59)        | 0.72         | 1.11 (0.71, 1.73)              | 0.65         |
| 20:3                       | 0.70 (0.41, 1.19)        | 0.18         | <b>0.56 (0.32, 0.99)</b>       | <b>0.05</b>  | 1.05 (0.68, 1.62)        | 0.82         | 1.08 (0.67, 1.73)              | 0.77         |
| 16:2                       | 0.65 (0.39, 1.09)        | 0.10         | <b>0.57 (0.33, 0.98)</b>       | <b>0.04</b>  | 0.99 (0.64, 1.55)        | 0.97         | 1.00 (0.63, 1.60)              | 1.00         |
| 18:2                       | <b>0.58 (0.36, 0.93)</b> | <b>0.03</b>  | <b>0.49 (0.29, 0.83)</b>       | <b>0.008</b> | 1.05 (0.70, 1.58)        | 0.80         | 1.11 (0.71, 1.75)              | 0.64         |
| 16:1                       | 0.67 (0.41, 1.08)        | 0.10         | <b>0.59 (0.36, 0.97)</b>       | <b>0.04</b>  | 0.92 (0.61, 1.38)        | 0.68         | 0.92 (0.59, 1.44)              | 0.73         |
| 18:1                       | <b>0.20 (0.32, 0.83)</b> | <b>0.007</b> | <b>0.45 (0.27, 0.75)</b>       | <b>0.002</b> | 1.08 (0.70, 1.67)        | 0.72         | 1.15 (0.72, 1.84)              | 0.56         |
| 16:0                       | <b>0.51 (0.31, 0.84)</b> | <b>0.008</b> | <b>0.45 (0.27, 0.76)</b>       | <b>0.003</b> | 0.99 (0.64, 1.55)        | 0.97         | 1.01 (0.63, 1.63)              | 0.96         |
| Cholesterol                | 1.00 (0.54, 1.83)        | 0.99         | 0.92 (0.45, 1.87)              | 0.82         | 1.43 (0.85, 2.42)        | 0.18         | 1.66 (0.89, 3.09)              | 0.11         |
| Total                      | <b>0.54 (0.33, 0.89)</b> | <b>0.02</b>  | <b>0.46 (0.27, 0.79)</b>       | <b>0.05</b>  | 1.05 (0.67, 1.63)        | 0.84         | 1.11 (0.68, 1.79)              | 0.68         |
| Cholesterol (Triglyceride) |                          |              |                                |              |                          |              |                                |              |
| POS                        | 0.97 (0.56, 1.68)        | 0.91         | 0.91 (0.51, 1.63)              | 0.76         | <b>1.93 (1.21, 3.10)</b> | <b>0.006</b> | <b>2.07 (1.24, 3.47)</b>       | <b>0.006</b> |

Models control for date between visits, site, sex, and NNRTI use. For both predicting cognitive decline (any MSK increase vs. stable MSK) and cognitive improvement (any MSK decrease vs. stable MSK), the first model includes all individuals. The second model only includes those with less than one year between visits.

**Table e-4. CSF Log Sphingolipids are Associated with Cognitive Decline in HIV+ Individuals**

| Baseline Log Sphingolipid                 | Cognitive Decline – All (n=203) |             | Cognitive Decline – Visits <365 days (n=165) |         |
|-------------------------------------------|---------------------------------|-------------|----------------------------------------------|---------|
|                                           | OR (95% CI)                     | p-value     | OR (95% CI)                                  | p-value |
| <b>Ceramide</b>                           |                                 |             |                                              |         |
| 16:0                                      | 0.79 (0.61, 1.02)               | 0.08        | 0.88 (0.67, 1.16)                            | 0.37    |
| 18:0                                      | <b>0.78 (0.61, 0.99)</b>        | <b>0.04</b> | 0.84 (0.65, 1.09)                            | 0.19    |
| 20:0                                      | 0.83 (0.65, 1.07)               | 0.15        | 0.91 (0.70, 1.18)                            | 0.47    |
| 24:1                                      | 0.83 (0.65, 1.06)               | 0.13        | 0.86 (0.67, 1.11)                            | 0.25    |
| 24:0                                      | <b>0.75 (0.57, 0.97)</b>        | <b>0.03</b> | 0.79 (0.61, 1.02)                            | 0.08    |
| <b>Sphingomyelin</b>                      |                                 |             |                                              |         |
| 16:0                                      | 1.08 (0.86, 1.35)               | 0.51        | 1.06 (0.83, 1.35)                            | 0.64    |
| 18:1                                      | 1.08 (0.87, 1.33)               | 0.50        | 1.05 (0.84, 1.32)                            | 0.66    |
| 18:0                                      | 1.08 (0.87, 1.34)               | 0.47        | 1.06 (0.85, 1.33)                            | 0.62    |
| 20:1                                      | 1.07 (0.86, 1.34)               | 0.56        | 0.94 (0.77, 1.14)                            | 0.51    |
| 22:1                                      | 1.05 (0.84, 1.32)               | 0.65        | 1.04 (0.82, 1.32)                            | 0.72    |
| 22:0                                      | 1.09 (0.87, 1.37)               | 0.46        | 1.07 (0.84, 1.37)                            | 0.57    |
| 24:1                                      | 1.10 (0.88, 1.36)               | 0.41        | 1.09 (0.86, 1.38)                            | 0.46    |
| 24:0                                      | 1.05 (0.89, 1.24)               | 0.57        | 1.04 (0.88, 1.24)                            | 0.62    |
| <b>Sphingomyelin/Ceramide Ratio</b>       |                                 |             |                                              |         |
| 16:0                                      | <b>5.07 (1.06, 24.15)</b>       | <b>0.04</b> | 2.50 (0.48, 130.5)                           | 0.28    |
| 18:0                                      | <b>11.86 (1.39, 100.90)</b>     | <b>0.02</b> | 5.04 (0.53, 48.07)                           | 0.16    |
| 24:1                                      | 4.82 (0.88, 26.47)              | 0.07        | 2.86 (0.48, 17.02)                           | 0.25    |
| 24:0                                      | <b>7.98 (1.18, 54.21)</b>       | <b>0.03</b> | 4.88 (0.69, 34.55)                           | 0.11    |
| <b>Total Ceramide</b>                     |                                 |             |                                              |         |
| Total Ceramide                            | <b>0.76 (0.58, 0.98)</b>        | <b>0.04</b> | 0.82 (0.62, 1.07)                            | 0.14    |
| <b>Total Sphingomyelin</b>                |                                 |             |                                              |         |
| Total Sphingomyelin                       | 1.13 (0.90, 1.42)               | 0.31        | 1.11 (0.87, 1.42)                            | 0.40    |
| <b>Total Sphingomyelin/Ceramide Ratio</b> |                                 |             |                                              |         |
| Total Sphingomyelin/Ceramide Ratio        | <b>15.02 (1.30, 174.02)</b>     | <b>0.03</b> | 5.09 (0.39, 65.79)                           | 0.21    |

All models control for time between visit and site and examine change in log sphingolipid between visit 1 and 2 and change in MSK. The first model includes all individuals. The second model only includes those with less than one year between visits.

**Table e-5. Baseline Associations Between CSF Lipids, Antiretroviral Drugs, and CNS Penetrance Effectiveness**

| Log Lipid                | NRTI (n=203) |                | NNRTI (n=90) |                  | PI (n=149) |                | FI (n=3) |                | II (n=9)     |                | CPE          |                |
|--------------------------|--------------|----------------|--------------|------------------|------------|----------------|----------|----------------|--------------|----------------|--------------|----------------|
|                          | <i>b</i>     | <i>p-value</i> | <i>b</i>     | <i>p-value</i>   | <i>b</i>   | <i>p-value</i> | <i>b</i> | <i>p-value</i> | <i>b</i>     | <i>p-value</i> | <i>b</i>     | <i>p-value</i> |
| <i>Sphingolipids</i>     |              |                |              |                  |            |                |          |                |              |                |              |                |
| Cer 16:0                 | -0.179       | 0.339          | -0.169       | 0.270            | 0.034      | 0.819          | -0.103   | 0.882          | 0.753        | 0.066          | -0.012       | 0.537          |
| Cer 18:0                 | -0.011       | 0.958          | -0.097       | 0.574            | -0.020     | 0.906          | 0.046    | 0.953          | 0.887        | 0.055          | 0.001        | 0.971          |
| Cer 20:0                 | -0.106       | 0.571          | -0.081       | 0.598            | -0.017     | 0.910          | -0.023   | 0.974          | <b>0.827</b> | <b>0.044</b>   | -0.004       | 0.838          |
| Cer 24:1                 | -0.093       | 0.638          | 0.043        | 0.791            | -0.029     | 0.852          | -0.030   | 0.967          | 0.594        | 0.172          | 0.005        | 0.764          |
| Cer 24:0                 | -0.138       | 0.512          | -0.026       | 0.881            | -0.028     | 0.869          | -0.044   | 0.955          | 0.715        | 0.120          | -0.001       | 0.993          |
| SM 16:0                  | -0.023       | 0.913          | 0.072        | 0.670            | -0.066     | 0.689          | -0.410   | 0.596          | 0.845        | 0.064          | 0.004        | 0.851          |
| SM 18:1                  | 0.075        | 0.734          | 0.146        | 0.416            | -0.063     | 0.717          | -0.204   | 0.802          | 0.816        | 0.090          | 0.015        | 0.517          |
| SM 18:0                  | -0.008       | 0.970          | 0.081        | 0.652            | -0.096     | 0.583          | -0.329   | 0.686          | 0.845        | 0.079          | 0.003        | 0.914          |
| SM 20:1                  | 0.007        | 0.975          | 0.203        | 0.240            | -0.175     | 0.294          | -0.365   | 0.641          | 0.798        | 0.085          | 0.007        | 0.750          |
| SM 22:1                  | 0.041        | 0.846          | 0.242        | 0.162            | -0.190     | 0.255          | -0.347   | 0.658          | 0.751        | 0.107          | 0.012        | 0.606          |
| SM 22:0                  | 0.004        | 0.983          | 0.151        | 0.374            | -0.121     | 0.458          | -0.099   | 0.897          | 0.786        | 0.084          | 0.008        | 0.705          |
| SM 24:1                  | 0.047        | 0.834          | 0.212        | 0.250            | -0.138     | 0.438          | -0.301   | 0.720          | 0.828        | 0.095          | 0.015        | 0.530          |
| SM 24:0                  | -0.009       | 0.973          | 0.120        | 0.581            | -0.134     | 0.521          | -0.186   | 0.850          | 0.792        | 0.174          | 0.003        | 0.928          |
| SM/Cer 16:0              | 0.017        | 0.515          | 0.033        | 0.109            | 0.019      | 0.346          | -0.042   | 0.658          | -0.034       | 0.547          | 0.002        | 0.583          |
| SM/Cer 18:0              | -0.013       | 0.581          | 0.007        | 0.722            | -0.001     | 0.962          | -0.049   | 0.586          | -0.042       | 0.436          | -0.001       | 0.594          |
| SM/Cer 24:1              | 0.017        | 0.524          | 0.017        | 0.406            | -0.018     | 0.371          | -0.050   | 0.605          | -0.023       | 0.693          | -0.001       | 0.943          |
| SM/Cer 24:0              | 0.020        | 0.460          | 0.019        | 0.378            | -0.014     | 0.509          | -0.019   | 0.843          | 0.003        | 0.962          | 0.001        | 0.851          |
| Total Cer                | -0.120       | 0.539          | -0.087       | 0.587            | -0.004     | 0.979          | -0.032   | 0.965          | 0.812        | 0.057          | -0.002       | 0.905          |
| Total SM                 | -0.056       | 0.788          | 0.098        | 0.566            | -0.117     | 0.478          | -0.336   | 0.663          | 0.811        | 0.076          | 0.001        | 0.971          |
| Total SM/Cer             | 0.010        | 0.594          | 0.019        | 0.234            | -0.011     | 0.472          | -0.034   | 0.629          | -0.028       | 0.510          | 0.001        | 0.851          |
| <i>Cholesterol ester</i> |              |                |              |                  |            |                |          |                |              |                |              |                |
| 20:6                     | 0.167        | 0.322          | 0.190        | 0.166            | 0.031      | 0.817          | -0.075   | 0.904          | <b>0.759</b> | <b>0.038</b>   | 0.011        | 0.531          |
| 22:6                     | 0.281        | 0.080          | <b>0.266</b> | <b>0.041</b>     | 0.064      | 0.613          | -0.340   | 0.564          | 0.240        | 0.492          | 0.025        | 0.139          |
| 20:5                     | <b>0.410</b> | <b>0.007</b>   | <b>0.280</b> | <b>0.025</b>     | 0.033      | 0.784          | 0.311    | 0.582          | -0.017       | 0.958          | 0.025        | 0.123          |
| 22:5                     | 0.287        | 0.170          | -0.020       | 0.906            | 0.239      | 0.148          | -0.647   | 0.380          | 0.629        | 0.168          | 0.017        | 0.444          |
| 18:4                     | 0.160        | 0.326          | <b>0.571</b> | <b>&lt;0.001</b> | -0.201     | 0.117          | 0.062    | 0.295          | -0.218       | 0.538          | 0.015        | 0.378          |
| 20:4                     | <b>0.366</b> | <b>0.026</b>   | 0.212        | 0.117            | 0.036      | 0.786          | 0.349    | 0.567          | -0.234       | 0.517          | 0.020        | 0.256          |
| 18:3                     | <b>0.316</b> | <b>0.038</b>   | <b>0.344</b> | <b>0.006</b>     | -0.088     | 0.469          | 0.024    | 0.966          | -0.264       | 0.433          | 0.018        | 0.274          |
| 20:3                     | 0.270        | 0.053          | <b>0.377</b> | <b>0.001</b>     | -0.046     | 0.675          | 0.202    | 0.694          | -0.246       | 0.419          | 0.021        | 0.169          |
| 16:2                     | 0.231        | 0.080          | <b>0.320</b> | <b>0.003</b>     | -0.009     | 0.928          | -0.007   | 0.989          | -0.090       | 0.754          | 0.022        | 0.114          |
| 18:2                     | <b>0.322</b> | <b>0.025</b>   | <b>0.246</b> | <b>0.043</b>     | -0.017     | 0.887          | 0.027    | 0.961          | -0.270       | 0.416          | 0.019        | 0.238          |
| 16:1                     | <b>0.307</b> | <b>0.026</b>   | <b>0.379</b> | <b>0.001</b>     | -0.017     | 0.877          | 0.057    | 0.911          | -0.157       | 0.606          | <b>0.029</b> | <b>0.049</b>   |
| 18:1                     | <b>0.369</b> | <b>0.008</b>   | 0.199        | 0.084            | 0.092      | 0.408          | 0.085    | 0.870          | -0.218       | 0.480          | 0.026        | 0.083          |
| 16:0                     | <b>0.386</b> | <b>0.004</b>   | 0.109        | 0.320            | 0.166      | 0.117          | -0.061   | 0.902          | -0.283       | 0.335          | 0.026        | 0.074          |
| Total Cholesterol        | 0.267        | 0.051          | 0.203        | 0.065            | 0.102      | 0.311          | -0.487   | 0.302          | -0.139       | 0.629          | 0.013        | 0.382          |
| Pos (Triglyceride)       | -0.083       | 0.519          | -0.050       | 0.632            | 0.011      | 0.914          | 0.009    | 0.986          | -0.011       | 0.969          | -0.007       | 0.602          |

Nucleoside reverse transcriptase inhibitor (NRTI), Non-nucleoside reverse transcriptase inhibitor (NNRTI), Protease inhibitor (PI), Fusion inhibitors (FI), Integrase inhibitors (II), CNS penetration effectiveness (CPE).

**Table e-6. Baseline Associations Between CSF Lipids and Non-Nucleoside Reverse Transcriptase Inhibitors**

| Log Lipid                | NVP (n=22)   |                | DLV (n=2) |                | EFV (n=63)    |                | ETR (n=3) |                |
|--------------------------|--------------|----------------|-----------|----------------|---------------|----------------|-----------|----------------|
|                          | <i>b</i>     | <i>p-value</i> | <i>b</i>  | <i>p-value</i> | <i>b</i>      | <i>p-value</i> | <i>b</i>  | <i>p-value</i> |
| <i>Sphingolipids</i>     |              |                |           |                |               |                |           |                |
| Cer 16:0                 | 0.236        | 0.377          | 0.924     | 0.271          | <b>-0.395</b> | <b>0.021</b>   | 0.744     | 0.283          |
| Cer 18:0                 | 0.228        | 0.446          | 0.961     | 0.308          | -0.320        | 0.097          | 1.023     | 0.189          |
| Cer 20:0                 | 0.235        | 0.377          | 1.107     | 0.187          | -0.202        | 0.089          | 0.748     | 0.281          |
| Cer 24:1                 | 0.222        | 0.431          | 1.187     | 0.181          | -0.139        | 0.444          | 0.833     | 0.256          |
| Cer 24:0                 | 0.253        | 0.397          | 0.642     | 0.495          | -0.211        | 0.277          | 0.709     | 0.362          |
| SM 16:0                  | 0.240        | 0.418          | -0.318    | 0.733          | -0.055        | 0.775          | 0.972     | 0.207          |
| SM 18:1                  | 0.325        | 0.452          | -0.232    | 0.813          | 0.038         | 0.849          | 0.942     | 0.246          |
| SM 18:0                  | 0.336        | 0.283          | -0.575    | 0.559          | -0.070        | 0.727          | 0.929     | 0.253          |
| SM 20:1                  | 0.273        | 0.365          | -0.155    | 0.870          | 0.092         | 0.634          | 0.922     | 0.239          |
| SM 22:1                  | 0.288        | 0.340          | -0.259    | 0.785          | 0.141         | 0.467          | 0.893     | 0.256          |
| SM 22:0                  | 0.241        | 0.413          | -0.183    | 0.844          | 0.039         | 0.837          | 0.947     | 0.217          |
| SM 24:1                  | 0.313        | 0.330          | 0.046     | 0.964          | 0.072         | 0.727          | 1.026     | 0.220          |
| SM 24:0                  | 0.356        | 0.345          | 0.148     | 0.901          | -0.067        | 0.783          | 1.039     | 0.290          |
| SM/Cer 16:0              | -0.006       | 0.870          | -0.170    | 0.138          | 0.053         | 0.024          | -0.020    | 0.829          |
| SM/Cer 18:0              | 0.018        | 0.612          | -0.156    | 0.151          | 0.011         | 0.625          | -0.045    | 0.621          |
| SM/Cer 24:1              | 0.012        | 0.741          | -0.175    | 0.131          | 0.027         | 0.257          | -0.041    | 0.669          |
| SM/Cer 24:0              | -0.010       | 0.796          | -0.069    | 0.563          | 0.030         | 0.229          | 0.030     | 0.761          |
| Total Cer                | 0.254        | 0.360          | 0.909     | 0.297          | -0.308        | 0.087          | 0.834     | 0.246          |
| Total SM                 | 0.242        | 0.413          | -0.311    | 0.739          | -0.023        | 0.905          | 0.948     | 0.219          |
| Total SM/Cer             | -0.005       | 0.867          | -0.126    | 0.143          | 0.032         | 0.070          | -0.017    | 0.806          |
| <i>Cholesterol ester</i> |              |                |           |                |               |                |           |                |
| 20:6                     | 0.389        | 0.102          | 0.303     | 0.686          | 0.021         | 0.890          | 0.676     | 0.274          |
| 22:6                     | 0.425        | 0.061          | 0.064     | 0.928          | 0.124         | 0.399          | 0.494     | 0.402          |
| 20:5                     | 0.258        | 0.235          | 0.599     | 0.381          | 0.188         | 0.182          | 0.517     | 0.360          |
| 22:5                     | 0.159        | 0.591          | -0.756    | 0.416          | -0.090        | 0.639          | 0.480     | 0.533          |
| 18:4                     | <b>0.590</b> | <b>0.010</b>   | 0.321     | 0.657          | 0.454         | 0.002          | 0.067     | 0.911          |
| 20:4                     | 0.059        | 0.800          | 0.656     | 0.373          | 0.185         | 0.223          | 0.478     | 0.433          |
| 18:3                     | 0.354        | 0.103          | 0.649     | 0.343          | 0.245         | 0.082          | 0.218     | 0.701          |
| 20:3                     | 0.365        | 0.063          | 0.380     | 0.540          | <b>0.303</b>  | <b>0.017</b>   | 0.039     | 0.939          |
| 16:2                     | <b>0.423</b> | <b>0.023</b>   | 0.257     | 0.661          | 0.205         | 0.090          | 0.162     | 0.739          |
| 18:2                     | 0.225        | 0.285          | 0.552     | 0.406          | 0.181         | 0.185          | 0.180     | 0.743          |
| 16:1                     | <b>0.507</b> | <b>0.010</b>   | 0.523     | 0.398          | 0.234         | 0.067          | 0.159     | 0.756          |
| 18:1                     | 0.202        | 0.312          | 0.460     | 0.465          | 0.139         | 0.285          | 0.134     | 0.797          |
| 16:0                     | 0.255        | 0.180          | 0.197     | 0.743          | 0.029         | 0.817          | -0.102    | 0.838          |
| total cholesterol        | 0.205        | 0.302          | 0.475     | 0.416          | 0.137         | 0.270          | 0.261     | 0.589          |
| pos (Triglyceride)       | 0.110        | 0.543          | 0.358     | 0.530          | -0.138        | 0.240          | 0.214     | 0.651          |

Nevirapine (NVP ), Delavirdine (DLV), Efavirenz (EFV), Etravirine (ETR)

**Table e-7. Baseline Associations Between CSF Lipids and Nucleoside Reverse Transcriptase Inhibitors**

| Log Lipid                | AZT (n=75)    |              | ABC (n=68) |         | FTC (n=62)    |              | DDI (n=18)   |              | 3TC (n=134)  |              | D4T (n=27) |         | TDF (n=109)   |              |
|--------------------------|---------------|--------------|------------|---------|---------------|--------------|--------------|--------------|--------------|--------------|------------|---------|---------------|--------------|
|                          | b             | p-value      | b          | p-value | b             | p-value      | b            | p-value      | b            | p-value      | b          | p-value | b             | p-value      |
| <i>Sphingolipids</i>     |               |              |            |         |               |              |              |              |              |              |            |         |               |              |
| Cer 16:0                 | -0.050        | 0.763        | 0.080      | 0.633   | -0.320        | 0.075        | 0.024        | 0.935        | 0.147        | 0.324        | 0.323      | 0.239   | <b>-0.405</b> | <b>0.006</b> |
| Cer 18:0                 | -0.125        | 0.501        | 0.211      | 0.262   | -0.248        | 0.221        | 0.201        | 0.539        | 0.201        | 0.230        | 0.474      | 0.123   | -0.305        | 0.069        |
| Cer 20:0                 | -0.008        | 0.953        | 0.086      | 0.610   | -0.318        | 0.077        | 0.087        | 0.765        | 0.217        | 0.144        | 0.349      | 0.203   | <b>-0.435</b> | <b>0.003</b> |
| Cer 24:1                 | 0.015         | 0.934        | 0.148      | 0.403   | -0.321        | 0.092        | 0.094        | 0.760        | 0.199        | 0.206        | 0.393      | 0.175   | <b>-0.379</b> | <b>0.016</b> |
| Cer 24:0                 | 0.040         | 0.831        | 0.100      | 0.596   | -0.287        | 0.155        | 0.043        | 0.902        | 0.122        | 0.465        | 0.302      | 0.324   | <b>-0.460</b> | <b>0.006</b> |
| SM 16:0                  | 0.020         | 0.911        | 0.090      | 0.626   | -0.380        | 0.057        | -0.185       | 0.568        | <b>0.346</b> | <b>0.036</b> | 0.382      | 0.207   | <b>-0.374</b> | <b>0.024</b> |
| SM 18:1                  | 0.056         | 0.771        | 0.132      | 0.499   | -0.356        | 0.092        | -0.200       | 0.558        | <b>0.408</b> | <b>0.019</b> | 0.373      | 0.243   | <b>-0.359</b> | <b>0.040</b> |
| SM 18:0                  | 0.035         | 0.850        | 0.072      | 0.714   | <b>-0.447</b> | <b>0.034</b> | -0.222       | 0.516        | <b>0.409</b> | <b>0.018</b> | 0.429      | 0.179   | <b>-0.370</b> | <b>0.034</b> |
| SM 20:1                  | 0.059         | 0.750        | 0.087      | 0.644   | -0.315        | 0.121        | -0.111       | 0.736        | 0.316        | 0.060        | 0.277      | 0.368   | <b>-0.400</b> | <b>0.017</b> |
| SM 22:1                  | 0.073         | 0.695        | 0.119      | 0.528   | -0.332        | 0.103        | -0.112       | 0.734        | <b>0.343</b> | <b>0.041</b> | 0.269      | 0.384   | <b>-0.377</b> | <b>0.026</b> |
| SM 22:0                  | 0.053         | 0.772        | 0.131      | 0.477   | -0.376        | 0.059        | -0.215       | 0.504        | <b>0.366</b> | <b>0.025</b> | 0.312      | 0.301   | <b>-0.375</b> | <b>0.023</b> |
| SM 24:1                  | 0.081         | 0.684        | 0.192      | 0.340   | -0.411        | 0.058        | -0.227       | 0.518        | <b>0.438</b> | <b>0.014</b> | 0.422      | 0.199   | <b>-0.453</b> | <b>0.012</b> |
| SM 24:0                  | 0.062         | 0.792        | 0.082      | 0.728   | <b>-0.534</b> | <b>0.036</b> | -0.254       | 0.538        | <b>0.521</b> | <b>0.013</b> | 0.584      | 0.130   | <b>-0.455</b> | <b>0.031</b> |
| SM/Cer 16:0              | 0.010         | 0.657        | -0.007     | 0.773   | 0.006         | 0.808        | -0.029       | 0.465        | 0.013        | 0.514        | -0.010     | 0.784   | 0.018         | 0.379        |
| SM/Cer 18:0              | 0.018         | 0.395        | -0.026     | 0.235   | -0.012        | 0.602        | -0.053       | 0.163        | 0.010        | 0.594        | -0.015     | 0.670   | -0.002        | 0.909        |
| SM/Cer 24:1              | 0.006         | 0.794        | -0.009     | 0.695   | 0.008         | 0.749        | -0.043       | 0.284        | 0.014        | 0.504        | -0.014     | 0.714   | 0.013         | 0.538        |
| SM/Cer 24:0              | 0.011         | 0.627        | -0.009     | 0.723   | -0.030        | 0.248        | -0.021       | 0.626        | <b>0.048</b> | <b>0.024</b> | 0.037      | 0.483   | -0.002        | 0.922        |
| Total Cer                | -0.028        | 0.871        | 0.119      | 0.498   | -0.310        | 0.097        | 0.100        | 0.754        | 0.189        | 0.223        | 0.365      | 0.199   | <b>-0.413</b> | <b>0.008</b> |
| Total SM                 | 0.029         | 0.873        | 0.088      | 0.635   | <b>-0.399</b> | <b>0.046</b> | -0.200       | 0.537        | <b>0.346</b> | <b>0.036</b> | 0.360      | 0.235   | <b>-0.400</b> | <b>0.016</b> |
| Total SM/Cer             | 0.008         | 0.654        | -0.005     | 0.753   | -0.001        | 0.957        | -0.020       | 0.535        | 0.009        | 0.560        | -0.009     | 0.741   | 0.010         | 0.513        |
| <i>Cholesterol ester</i> |               |              |            |         |               |              |              |              |              |              |            |         |               |              |
| 20:6                     | <b>-0.303</b> | <b>0.039</b> | 0.062      | 0.678   | -0.049        | 0.766        | 0.482        | 0.063        | -0.056       | 0.676        | 0.160      | 0.511   | 0.069         | 0.607        |
| 22:6                     | -0.168        | 0.231        | 0.046      | 0.745   | 0.020         | 0.899        | 0.391        | 0.114        | -0.022       | 0.861        | 0.112      | 0.630   | 0.172         | 0.178        |
| 20:5                     | -0.063        | 0.636        | 0.059      | 0.665   | 0.063         | 0.672        | 0.376        | 0.113        | 0.052        | 0.670        | 0.259      | 0.243   | 0.136         | 0.270        |
| 22:5                     | -0.242        | 0.186        | 0.073      | 0.695   | -0.029        | 0.886        | 0.561        | 0.082        | -0.078       | 0.641        | 0.059      | 0.847   | 0.164         | 0.326        |
| 18:4                     | -0.202        | 0.153        | 0.022      | 0.877   | 0.071         | 0.654        | 0.265        | 0.291        | -0.045       | 0.726        | 0.237      | 0.313   | 0.150         | 0.250        |
| 20:4                     | -0.041        | 0.775        | 0.072      | 0.624   | 0.060         | 0.707        | <b>0.503</b> | <b>0.049</b> | 0.050        | 0.706        | 0.278      | 0.245   | 0.073         | 0.581        |
| 18:3                     | -0.018        | 0.895        | 0.024      | 0.862   | 0.070         | 0.641        | 0.435        | 0.067        | 0.023        | 0.850        | 0.178      | 0.424   | 0.017         | 0.889        |
| 20:3                     | -0.131        | 0.281        | 0.084      | 0.497   | 0.043         | 0.751        | 0.345        | 0.108        | 0.007        | 0.953        | 0.222      | 0.271   | 0.118         | 0.292        |
| 16:2                     | -0.108        | 0.350        | 0.051      | 0.663   | 0.041         | 0.748        | 0.238        | 0.244        | 0.003        | 0.974        | 0.201      | 0.291   | 0.194         | 0.066        |
| 18:2                     | -0.048        | 0.712        | 0.059      | 0.656   | 0.080         | 0.581        | <b>0.533</b> | <b>0.020</b> | 0.008        | 0.946        | 0.174      | 0.419   | 0.060         | 0.618        |
| 16:1                     | -0.054        | 0.659        | 0.007      | 0.956   | 0.042         | 0.755        | 0.161        | 0.455        | 0.059        | 0.591        | 0.297      | 0.139   | <b>0.218</b>  | <b>0.050</b> |
| 18:1                     | -0.068        | 0.582        | 0.086      | 0.493   | 0.104         | 0.447        | 0.401        | 0.066        | 0.022        | 0.848        | 0.159      | 0.438   | 0.174         | 0.125        |
| 16:0                     | -0.010        | 0.932        | 0.032      | 0.787   | 0.108         | 0.410        | 0.312        | 0.124        | 0.026        | 0.810        | 0.173      | 0.374   | 0.180         | 0.096        |
| total cholesterol        | -0.074        | 0.528        | 0.029      | 0.809   | 0.053         | 0.682        | 0.394        | 0.059        | -0.020       | 0.853        | 0.200      | 0.306   | 0.044         | 0.687        |
| pos (Triglyceride)       | -0.142        | 0.207        | 0.219      | 0.053   | -0.091        | 0.465        | 0.059        | 0.767        | -0.042       | 0.680        | -0.190     | 0.305   | -0.042        | 0.682        |

Zidovudine (AZT), abacavir (ABC), Emtricitabine (FTC), Didanosine (DDI), lamivudine (3TC), Stavudine (d4T), Tenofovir (TDF)
